# Supplementary material for: Silybin Showed Higher Cytotoxic, Antiproliferative, and Anti-Inflammatory Activities in the CaCo Cancer Cell Line while Retaining Viability and Proliferation in Normal Intestinal IPEC-1 Cells
Source: MDPI journal article supplement (doi:10.3390/life13020492), 2023-02-10

## Supplementary files S1 and S2

**Figure S1: Gating strategy for cell cycle analysis.** After gating of the mail cell populations for IPEC-1 and Caco-2 cells and exclusion of doublets and aggregates, cell cycle was analysed based on the position of the individual phases (subG1, G1, S, G2/M) of the cell cycle on the histogram.

A) gating of the mail population of IPEC-1 cells

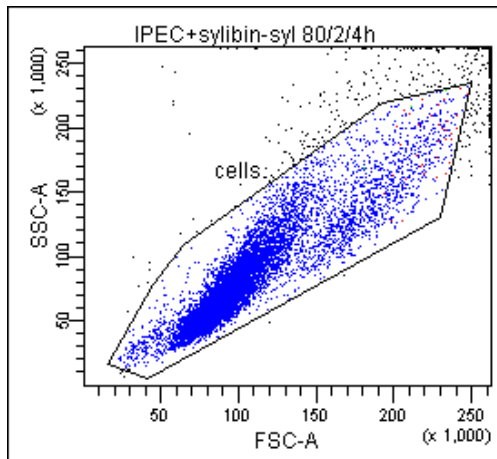

B) gating on singlet IPEC cells

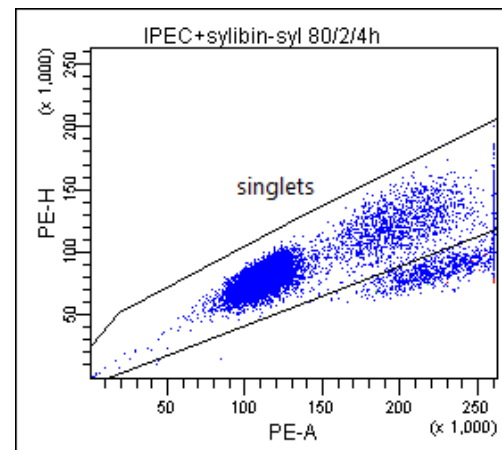

C) IPEC control cells after 4 h incubation

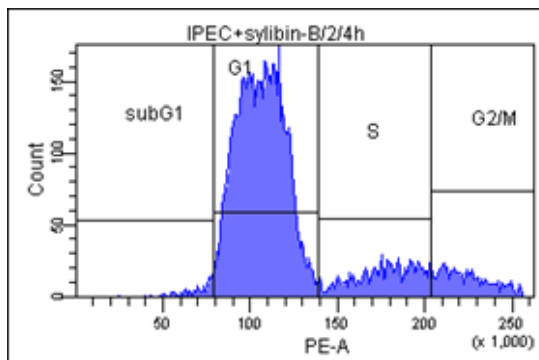

D) IPEC cells treated with 80  $\mu$ M Silybin after 4 h

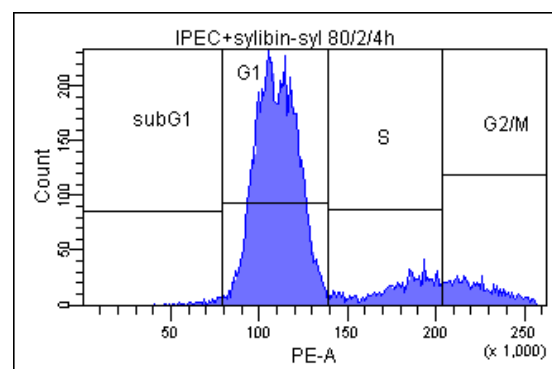

E) IPEC control cells after 24 h incubation

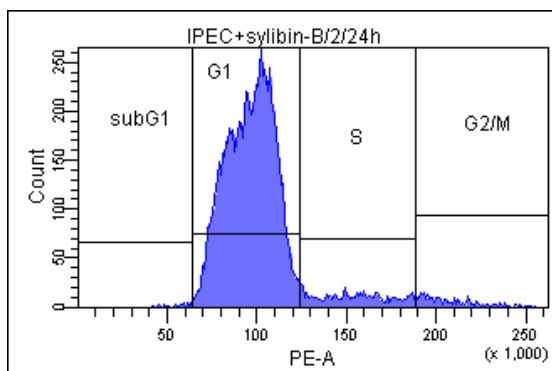

F) IPEC cells treated with 80  $\mu$ M Silybin after 24 h

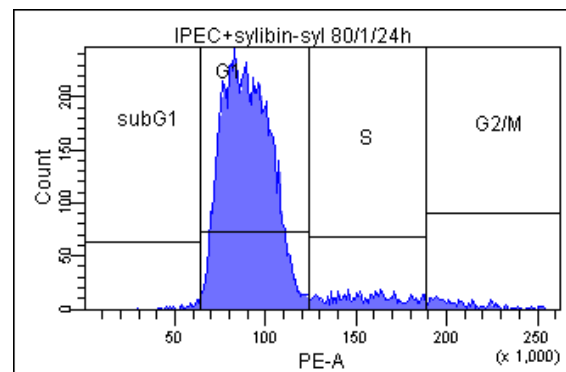

G) gating of the mail population of Caco-2 cells

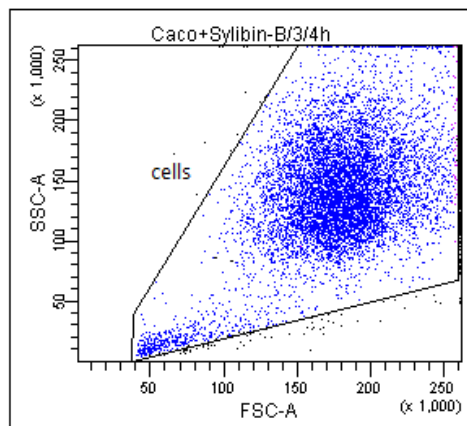

H) gating on singlet Caco cells

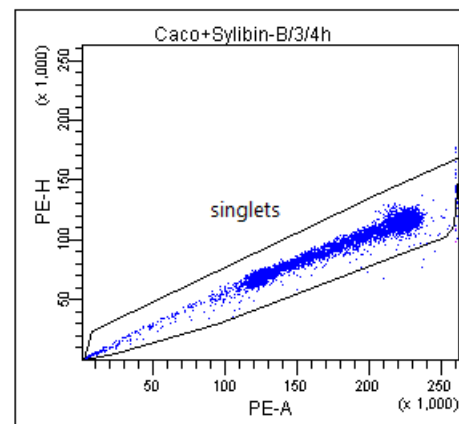

I) Caco control cells after 4 h incubation

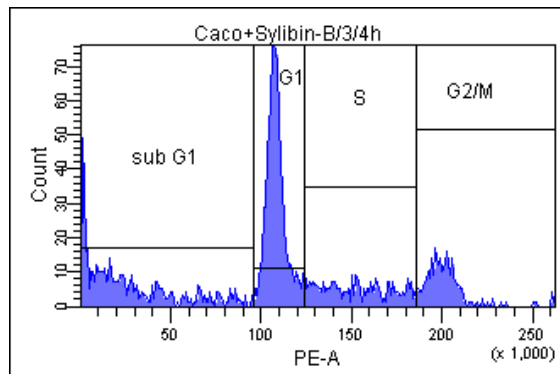

J) Caco cells treated with 80 uM Silybin after 4 h

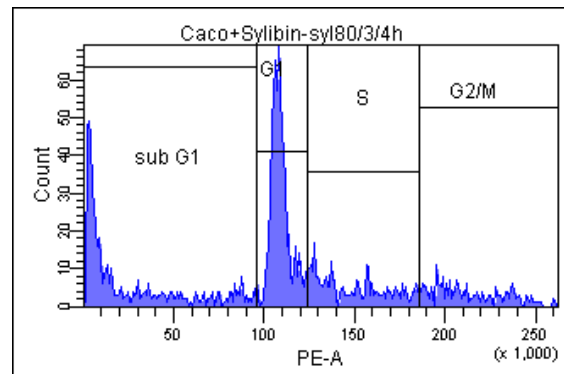

K) Caco control cells after 24 h incubation

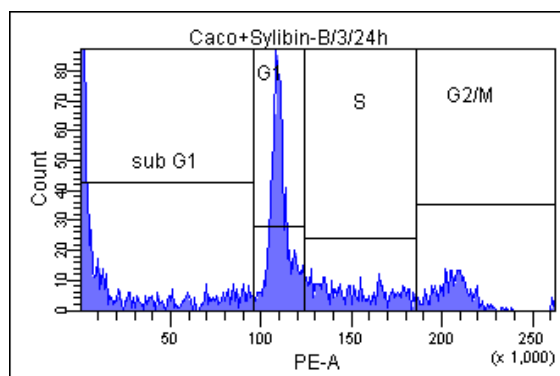

L) Caco cells treated with 80 uM Silybin after 24 h

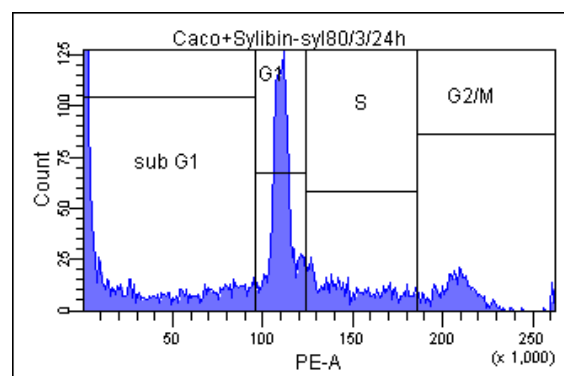

## Supplementary file S2

**Figure S2: Gating strategy for apoptosis.** After gating of the mail cell populations on dot plots FSC-A versus SSC-A for IPEC-1 and Caco-2 cells and exclusion of doublets and aggregates on dot plot PE-A versus PE-H as showed in Figure S1, apoptosis was analysed based on the position of live, early apoptic, late apoptic/dead cells on dot plot FITC-A (Annexin-V labeled with FITC) versus PE-A (propidium iodide). Gating for apoptosis differs between Caco and IPEC cells due to the high intrinsic autofluorescence of IPEC cells.

A) unlabeled IPEC cells after 4 h incubation

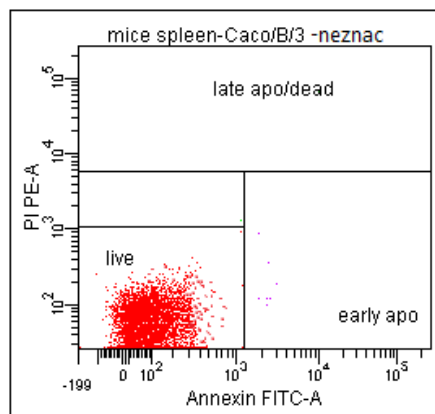

B) Caco control cells after 4 h incubation

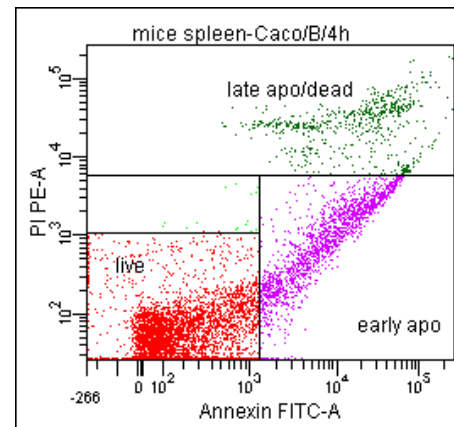

C) Caco cells treated with 80  $\mu$ M Silybin after 4 h

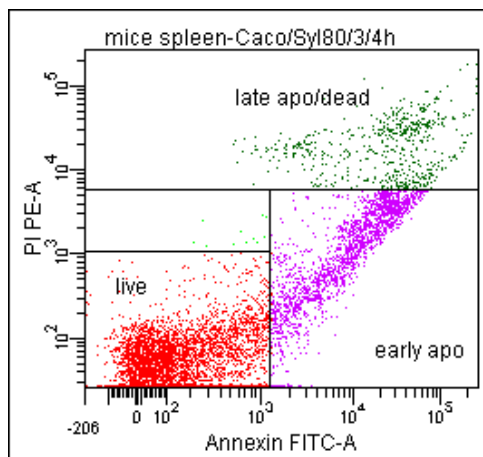

D) Caco control cells after 24 h incubation

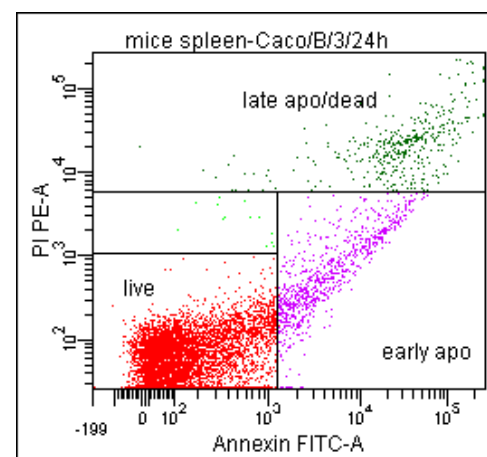

E) Caco cells treated with 80  $\mu$ M Silybin after 24 h incubation

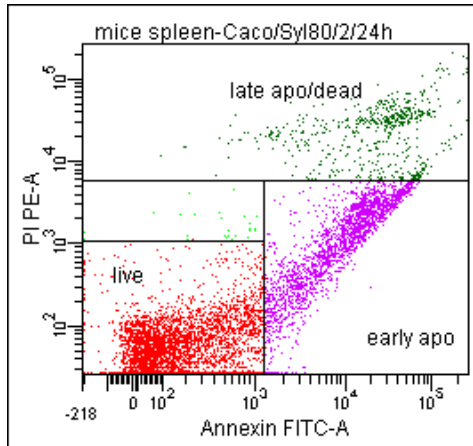

F) Unlabeled unlabeled IPEC control cells with high autofluorescence to FITC and PE (after 4 h incubation)

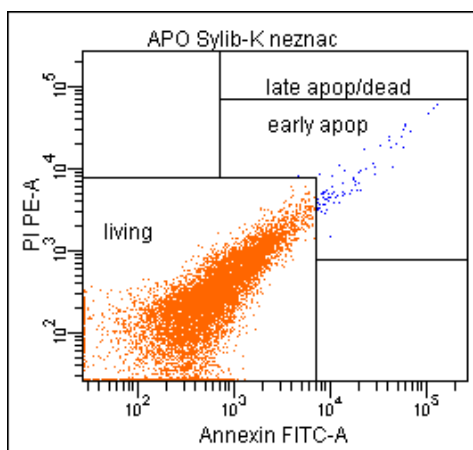

G) IPEC control cells after 4 h incubation

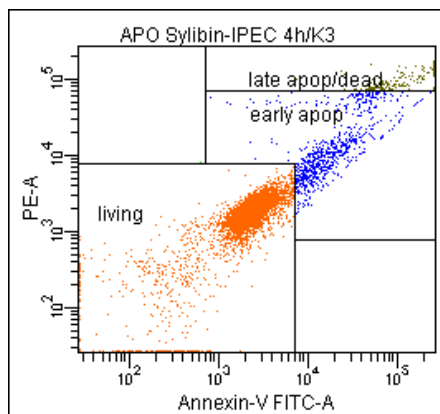

H) IPEC cells treated with 80  $\mu$ M Silybin after 4 h

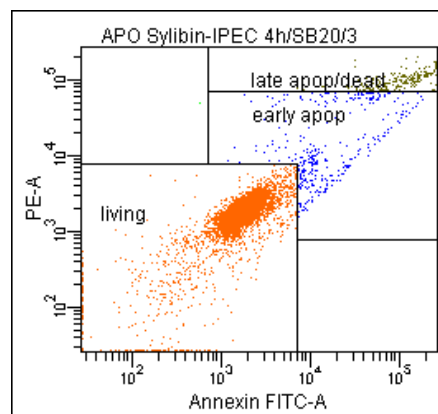

I) IPEC control cells after 24 h incubation

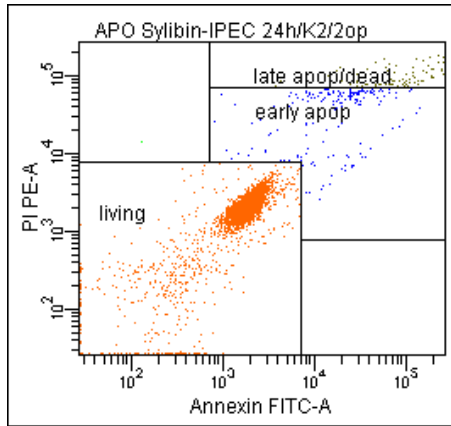

J) IPEC cells treated with 80  $\mu$ M Silybin after 24 h

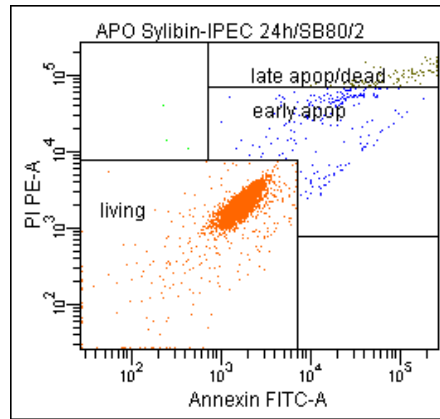

Supplement: s1 [file s1]
